# Supplementary material for: Salivary exosomal PSMA7: a promising biomarker of inflammatory bowel disease
Source: PubMed Central journal article supplement (PMC5563283; doi:10.1007/s13238-017-0413-7), 2017-05-18
Supplement: 13238_2017_413_MOESM1_ESM.pdf [file 13238_2017_413_MOESM1_ESM.pdf]

**Appendix Table 1. Clinical characterization of the IBD patients**

| <b>Group</b>    | <b>Number</b> | <b>Age(mean)</b> | <b>Gender</b>           | <b>Diagnose</b>             |
|-----------------|---------------|------------------|-------------------------|-----------------------------|
| Healthy control | 10            | 50.1             | 6 males and 4 females   | Without systematic diseases |
| UC              | 37            | 48.0             | 18 males and 19 females | Ulcerative colitis          |
| CD              | 11            | 45.5             | 6 males and 5 females   | Crohn disease               |

Appendix Table 1: Samples collected from healthy controls, UC and CD patients have been carefully controlled of the age, genders and systemic diseases. *P* value of age of the three group is 0.7428.
